# Supplementary material for: Y-Chromosome Variation in Altaian Kazakhs Reveals a Common Paternal Gene Pool for Kazakhs and the Influence of Mongolian Expansions
Source: PubMed Central journal article supplement (PMC3055870; doi:10.1371/journal.pone.0017548), 2011-03-11
Supplement: pone.0017548.s001.pdf [file pone.0017548.s001.pdf]

**Table S1: 17 Y-STR haplotypes for Altaian Kazakhs**

| Haplotype # | Haplogroup | DYS19 | DYS385 | DYS389I | DYS389II | DYS390 | DYS391 | DYS392 | DYS393 | DYS437 | DYS438 | DYS439 | DYS448 | DYS456 | DYS458 | DYS635 | Y GATA H4 | Southwestern | Southeastern |
|-------------|------------|-------|--------|---------|----------|--------|--------|--------|--------|--------|--------|--------|--------|--------|--------|--------|-----------|--------------|--------------|
| 1           | C3*        | 16    | 12-13  | 13      | 29       | 25     | 10     | 11     | 13     | 14     | 10     | 10     | 23     | 15     | 18     | 21     | 11        | 1            | 2            |
| 2           | C3*        | 17    | 12-13  | 13      | 29       | 25     | 10     | 11     | 13     | 14     | 10     | 10     | 22     | 15     | 18     | 21     | 11        | 2            |              |
| 3           | C3*        | 16    | 12-13  | 13      | 29       | 25     | 10     | 11     | 13     | 14     | 10     | 10     | 22     | 15     | 18     | 21     | 11        | 6            | 1            |
| 4           | C3*        | 16    | 12-13  | 13      | 29       | 25     | 10     | 11     | 13     | 14     | 10     | 10     | 22     | 15     | 17     | 21     | 11        | 1            |              |
| 5           | C3*        | 16    | 12-12  | 13      | 29       | 25     | 10     | 11     | 13     | 14     | 10     | 10     | 22     | 15     | 18     | 21     | 11        |              | 4            |
| 6           | C3*        | 15    | 12-14  | 14      | 30       | 24     | 10     | 11     | 13     | 14     | 11     | 10     | 20     | 17     | 17     | 21     | 11        |              | 1            |
| 7           | C3*        | 16    | 12-13  | 13      | 29       | 26     | 10     | 11     | 13     | 14     | 10     | 10     | 22     | 15     | 19     | 21     | 11        |              | 1            |
| 8           | C3*        | 16    | 12-13  | 13      | 29       | 25     | 10     | 11     | 13     | 14     | 10     | 10     | 21     | 15     | 18     | 21     | 11        |              | 1            |
| 9           | C3*        | 15    | 12-14  | 14      | 30       | 24     | 10     | 11     | 13     | 14     | 11     | 10     | X      | 18     | 17     | 21     | 11        |              | 1            |
| 10          | C3*        | 15    | 12-14  | 14      | 30       | 24     | 10     | 11     | 13     | 14     | 11     | 10     | X      | 17     | 17     | 21     | 11        |              | 1            |
| 11          | C3*        | 16    | 12-13  | 13      | 30       | 25     | 10     | 11     | 13     | 14     | 10     | 10     | 23     | 16     | 18     | 21     | 11        |              | 1            |
| 12          | C3*        | 16    | 12-13  | 13      | 29       | 25     | 10     | 11     | 13     | 14     | 10     | 10     | 23     | 15     | 17     | 22     | 11        |              | 1            |
| 13          | C3c        | 15-16 | 12-12  | 15      | 32       | 24     | 9      | 11     | 13     | 14     | 10     | 11     | 20     | 15     | 18     | 24     | 10        | 1            |              |
| 14          | C3c        | 15-16 | 12-12  | 13      | 30       | 24     | 9      | 11     | 13     | 14     | 10     | 12     | 20     | 15     | 19     | 24     | 10        | 2            |              |
| 15          | C3c        | 15-16 | 12-12  | 14      | 31       | 24     | 9      | 11     | 13     | 14     | 10     | 12     | 20     | 15     | 19     | 24     | 10        | 1            |              |
| 16          | C3c        | 16    | 12-12  | 14      | 31       | 23     | 9      | 11     | 13     | 14     | 10     | 11     | 20     | 15     | 19     | 23     | 10        | 1            |              |
| 17          | C3c        | 15-17 | 12-12  | 14      | 31       | 23     | 9      | 11     | 13     | 14     | 10     | 11     | 20     | 15     | 19     | 23     | 10        | 1            |              |
| 18          | C3c        | 15-16 | 12-12  | 13      | 30       | 24     | 9      | 11     | 13     | 14     | 10     | 11     | 20     | 15     | 19     | 24     | 10        |              | 1            |
| 19          | C3c        | 15-17 | 12-12  | 13      | 30       | 24     | 9      | 11     | 13     | 14     | 10     | 11     | 20     | 15     | 19     | 24     | 10        |              | 18           |
| 20          | C3c        | 15-17 | 12-12  | 13      | 30       | 24     | 9      | 11     | 13     | 14     | 10     | 11     | 20     | 15     | 18     | 24     | 10        |              | 6            |
| 21          | C3c        | 16-17 | 12-12  | 14      | 31       | 24     | 9      | 11     | 13     | 14     | 10     | 11     | 20     | 15     | 18     | 24     | 10        | 1            |              |
| 22          | C3c        | 15-17 | 12-12  | 13      | 30       | 24     | 9      | 11     | 13     | 14     | 10     | 11     | 20     | 15     | 18     | 25     | 10        |              | 1            |
| 23          | C3c        | 17-18 | 12-12  | 14      | 30       | 24     | 9      | 11     | 13     | 14     | 10     | 11     | 21     | 15     | 18     | 23     | 10        |              | 1            |
| 24          | C3c        | 15    | 12-12  | 14      | 31       | 24     | 9      | 11     | 13     | 14     | 10     | 11     | 20     | 15     | 18     | 24     | 10        |              | 1            |
| 25          | C3c        | 15-17 | 12-12  | 14      | 31       | 24     | 9      | 11     | 13     | 14     | 10     | 11     | 20     | 15     | 18     | 24     | 10        |              | 3            |
| 26          | C3c        | 15-17 | 12-12  | 13      | 30       | 24     | 9      | 11     | 13     | 14     | 10     | 12     | 20     | 15     | 19     | 24     | 10        |              | 1            |

| Haplotype # | Haplogroup | DYS19 | DYS385 | DYS389I | DYS389II | DYS390 | DYS391 | DYS392 | DYS393 | DYS437 | DYS438 | DYS439 | DYS448 | DYS456 | DYS458 | DYS635 | Y GATA H4 | Southwestern | Southeastern |
|-------------|------------|-------|--------|---------|----------|--------|--------|--------|--------|--------|--------|--------|--------|--------|--------|--------|-----------|--------------|--------------|
| 27          | C3c        | 15-17 | 12-12  | 13      | 30       | 24     | 9      | 11     | 13     | 14     | 10     | 11     | 20     | 15     | 19     | 25     | 10        |              | 3            |
| 28          | C3c        | 15-17 | 12-12  | 13      | 30       | 24     | 9      | 11     | 13     | 14     | 10     | 12     | 20     | 15     | 18     | 23     | 10        |              | 1            |
| 29          | C3c        | 15-17 | 12-12  | 13      | 30       | 24     | 9      | 11     | 13     | 14     | 10     | 11     | X      | 15     | 19     | 24     | 10        |              | 1            |
| 30          | C3c        | 15-17 | 12-12  | 14      | 31       | 24     | 9      | 11     | 13     | 14     | 10     | 11     | 20     | 15     | 20     | 24     | 10        |              | 1            |
| 31          | C3c        | 15-17 | 12-12  | 13      | 29       | 25     | 9      | 11     | 13     | 14     | 10     | 11     | 20     | 15     | 19     | 24     | 10        |              | 1            |
| 32          | C3c        | 15-17 | 12-12  | 13      | 31       | 24     | 9      | 11     | 13     | 14     | 10     | 11     | 20     | 15     | 19     | 24     | 10        |              | 1            |
| 33          | G1         | 13    | 13-17  | 14      | 29       | 23     | 10     | 12     | 13     | 16     | 10     | 13     | 22     | 16     | 15     | 20     | 11        | 3            |              |
| 34          | G1         | 13    | 13-17  | 14      | 29       | 23     | 11     | 12     | 13     | 16     | 10     | 12     | 22     | 16     | 15     | 20     | 11        |              | 1            |
| 35          | G2         | 15    | 16-16  | 13      | 29       | 22     | 10     | 10     | 13     | 16     | 10     | 11     | 21     | 16     | 17     | 21     | 11        | 2            |              |
| 36          | J2a        | 14    | 15-16  | 13      | 29       | 23     | 10     | 11     | 12     | 15     | 9      | 11     | 21     | 15     | 18     | 23     | 11        | 1            |              |
| 37          | J2a        | 14    | 13-16  | 13      | 29       | 24     | 11     | 11     | 12     | 15     | 9      | 11     | 19     | 15     | 20     | 21     | 11        |              | 4            |
| 38          | O3a3c*     | 15    | 13-18  | 12      | 28       | 23     | 10     | 13     | 12     | 15     | 10     | 12     | 19     | 15     | 17     | 20     | 12        | 1            |              |
| 39          | O3a3c*     | 15    | 13-18  | 12      | 29       | 22     | 10     | 13     | 12     | 15     | 10     | 12     | 19     | 15     | 17     | 19     | 12        |              | 1            |
| 40          | O3a3c*     | 15    | 13-18  | 12      | 29       | 23     | 10     | 13     | 12     | 15     | 10     | 12     | 19     | 15     | 17     | 19     | 12        |              | 19           |
| 41          | O3a3c*     | 15    | 13-17  | 12      | 29       | 23     | 10     | 13     | 12     | 15     | 10     | 12     | 19     | 15     | 17     | 19     | 12        |              | 3            |
| 42          | O3a3c*     | 13    | 12-15  | 12      | 28       | 23     | 10     | 12     | 12     | 15     | 11     | 11     | 19     | 15     | 17     | 19     | 11        |              | 3            |
| 43          | O3a3c*     | 15    | 14-18  | 12      | 29       | 23     | 10     | 13     | 12     | 15     | 10     | 12     | 19     | 15     | 17     | 19     | 12        |              | 1            |
| 44          | O3a3c*     | 15    | 13-18  | 12      | 29       | 23     | 10     | 13     | 12     | 15     | 10     | 13     | 19     | 15     | 17     | 19     | 12        |              | 1            |
| 45          | O3a3c*     | 15    | 13-18  | 13      | 30       | 23     | 10     | 13     | 12     | 15     | 10     | 12     | 19     | 15     | 17     | 19     | 12        |              | 1            |
| 46          | O3a3c*     | 15    | 13-18  | 12      | 29       | 23     | 10     | 13     | 12     | 15     | 10     | 12     | 19     | 15     | 17     | 20     | 12        |              | 1            |
| 47          | Q1a3*      | 13    | 15-16  | 13      | 30       | 23     | 10     | 14     | 12     | 13     | 11     | 11     | 20     | 15     | 16     | 22     | 11        | 1            |              |
| 48          | R1a1*      | 16    | 11-14  | 13      | 29       | 23     | 11     | 11     | 13     | 14     | 11     | 10     | 20     | 15     | 15     | 23     | 12        | 1            |              |
| 49          | R1b1b1     | 14    | 13-13  | 14      | 30       | 19     | 11     | 13     | 13     | 14     | 10     | 13     | 19     | 15     | 17     | 24     | 10        | 2            |              |
| 50          | R1b1b1     | 14    | 13-13  | 14      | 30       | 19     | 11     | 13     | 13     | 15     | 10     | 13     | 19     | 15     | 17     | 24     | 11        | 1            |              |
| 51          | T          | 15    | 13-15  | 13      | 29       | 23     | 11     | 13     | 13     | 14     | 9      | 11     | 18     | 17     | 15     | 21     | 11        | 1            |              |
