# Supplementary material for: Y-Chromosome Variation in Altaian Kazakhs Reveals a Common Paternal Gene Pool for Kazakhs and the Influence of Mongolian Expansions
Source: PubMed Central journal article supplement (PMC3055870; doi:10.1371/journal.pone.0017548), 2011-03-11
Supplement: pone.0017548.s002.pdf [file pone.0017548.s002.pdf]

**Table S2: R<sub>ST</sub> value matrix of Central Asian and Mongolian populations.**

|                   | SW Alt<br>Kazakh | SE Alt<br>Kazakh | Kazakh2 | Kazakh3 | Kazakh1 | Uzbek1 | Uzbek2 | Highland<br>Kyrgyz | Lowland<br>Kyrgyz | Uyghur1 | Uyghur2 | Uyghur3 | Turkmen | Kara-<br>kalpak1 | Kara-<br>kalpak2 | Mongolian | Inner<br>Mongolian |
|-------------------|------------------|------------------|---------|---------|---------|--------|--------|--------------------|-------------------|---------|---------|---------|---------|------------------|------------------|-----------|--------------------|
| SW Altaian Kazakh | *                | .005             | .000    | .000    | .051    | .073   | .010   | .000               | .000              | .271    | .797    | .118    | .028    | .072             | .007             | .089      | .002               |
| SE Altaian Kazakh | .091             | *                | .000    | .000    | .302    | .004   | .001   | .000               | .000              | .117    | .018    | .000    | .000    | .000             | .000             | .001      | .000               |
| Kazakh2           | .228             | .252             | *       | .206    | .000    | .002   | .000   | .000               | .032              | .000    | .000    | .000    | .000    | .000             | .000             | .000      | .000               |
| Kazakh3           | .160             | .252             | .010    | *       | .000    | .010   | .000   | .001               | .426              | .000    | .001    | .000    | .000    | .000             | .000             | .000      | .000               |
| Kazakh1           | .050             | .049             | .158    | .139    | *       | .005   | .001   | .000               | .000              | .016    | .090    | .000    | .006    | .004             | .000             | .007      | .000               |
| Uzbek1            | .047             | .089             | .102    | .075    | .088    | *      | .108   | .000               | .058              | .653    | .449    | .126    | .113    | .089             | .028             | .135      | .030               |
| Uzbek2            | .085             | .103             | .218    | .192    | .141    | .029   | *      | .000               | .000              | .401    | .212    | .248    | .000    | .001             | .311             | .123      | .409               |
| Highland Kyrgyz   | .300             | .444             | .243    | .120    | .387    | .172   | .253   | *                  | .018              | .000    | .000    | .000    | .000    | .000             | .000             | .000      | .000               |
| Lowland Kyrgyz    | .136             | .223             | .036    | -.001   | .143    | .036   | .130   | .053               | *                 | .002    | .006    | .000    | .000    | .000             | .000             | .001      | .001               |
| Uyghur1           | .008             | .052             | .138    | .113    | .059    | -.012  | -.001  | .197               | .079              | *       | .930    | .564    | .043    | .097             | .118             | .707      | .099               |
| Uyghur2           | -.020            | .049             | .128    | .095    | .029    | -.002  | .014   | .191               | .072              | -.023   | *       | .525    | .084    | .188             | .084             | .873      | .086               |
| Uyghur3           | .026             | .113             | .241    | .186    | .134    | .023   | .008   | .234               | .123              | -.007   | -.006   | *       | .000    | .001             | .208             | .104      | .028               |
| Turkmen           | .063             | .114             | .146    | .115    | .071    | .024   | .151   | .343               | .120              | .038    | .029    | .126    | *       | .247             | .000             | .001      | .000               |
| Kara-kalpak1      | .036             | .117             | .130    | .112    | .069    | .030   | .102   | .252               | .122              | .024    | .014    | .090    | .007    | *                | .000             | .007      | .000               |
| Kara-kalpak2      | .095             | .191             | .251    | .205    | .196    | .060   | .003   | .212               | .145              | .020    | .028    | .010    | .186    | .122             | *                | .024      | .103               |
| Mongolian         | .027             | .079             | .151    | .121    | .065    | .019   | .017   | .233               | .094              | -.010   | -.016   | .019    | .074    | .052             | .037             | *         | .106               |
| Inner Mongolian   | .108             | .135             | .174    | .151    | .130    | .052   | -.002  | .217               | .101              | .024    | .029    | .045    | .171    | .124             | .022             | .018      | *                  |

R<sub>ST</sub> values are located in the lower matrix. P-values were calculated from 100,000 permutations are located in the upper matrix. Comparative samples came from published sources: SW Altaian Kazakhs [this study], SE Altaians Kazakhs [this study], Kazakh1 [13], Kazakh2 [12], Kazakh3 [11], Uzbek1 [12], Uzbek2 [11], Highland Kyrgyz [11], Lowland Kyrgyz [11], Uyghur1 [12], Uyghur2 [39], Uyghur3 [39], Turkmen [11], Kara-kalpak1 [11], Kara-kalpak2 [11], Mongolian [39], Inner Mongolian [39].
